# Supplementary material for: Using Cave Drip Loggers to Characterize Groundwater Infiltration and Examine Hydrological Response in Cretaceous Karst Formation
Source: Copernicus journal article supplement (doi:10.5194/egusphere-2025-2623), 2025-10-02
Supplement: Supplementary file 1 [file egusphere-2025-2623-supplement.pdf]

# **1 Using Cave Drip Loggers to Characterize Groundwater Infiltration 2 and Examine Hydrological Response in Cretaceous Karst Formation**

3 Rowann Remie<sup>1</sup>, Kashif Mahmud<sup>1</sup>, Marcus Gary<sup>2</sup>, Jonathan D. Price<sup>1</sup>, Andrew Katumwehe<sup>3</sup>, and Brian  
4 Vauter<sup>4</sup>

5 <sup>1</sup>Kimbell School of Geoscience, Midwestern State University, Wichita Falls, TX 76308

6 <sup>2</sup>Jackson School of Geosciences, University of Texas, Austin, TX 78712

7 <sup>3</sup>Boone Pickens School of Geology, Oklahoma State University, Stillwater, OK 74078

8 <sup>4</sup>Natural Bridge Caverns, 26495 Natural Bridge Caverns Road, San Antonio, TX 78266

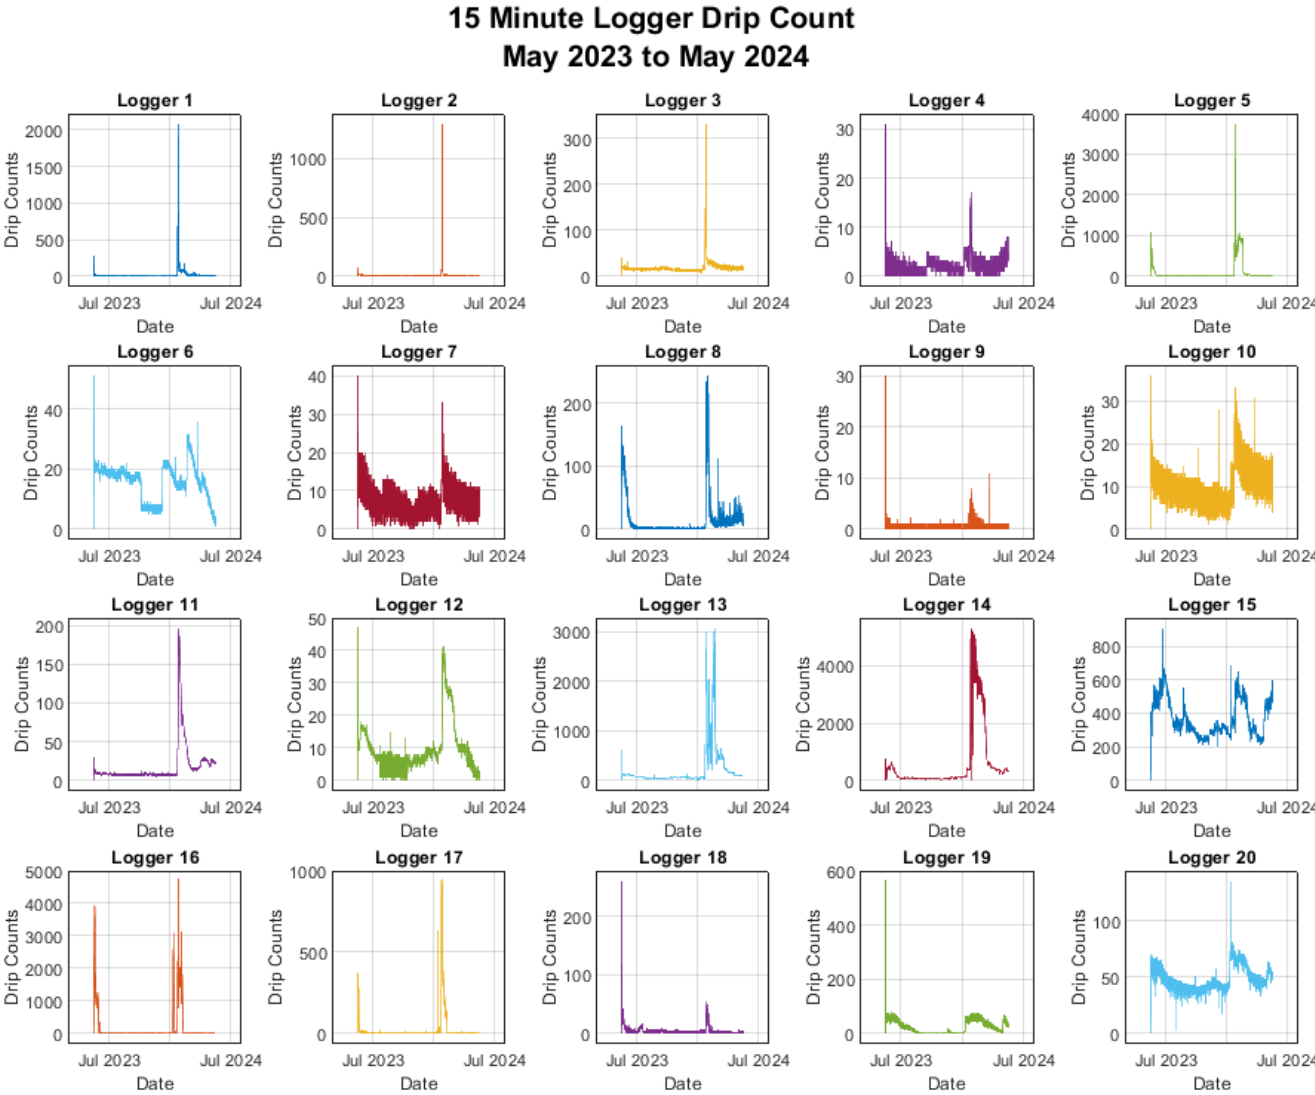

10

11 FIGURE S1 - All twenty drip logger time series for one hydrological year (May 2023 to May 2024).

# **Daily Rainfall (mm) vs Total Daily Logger Drip Count** **May 2023 to May 2024**

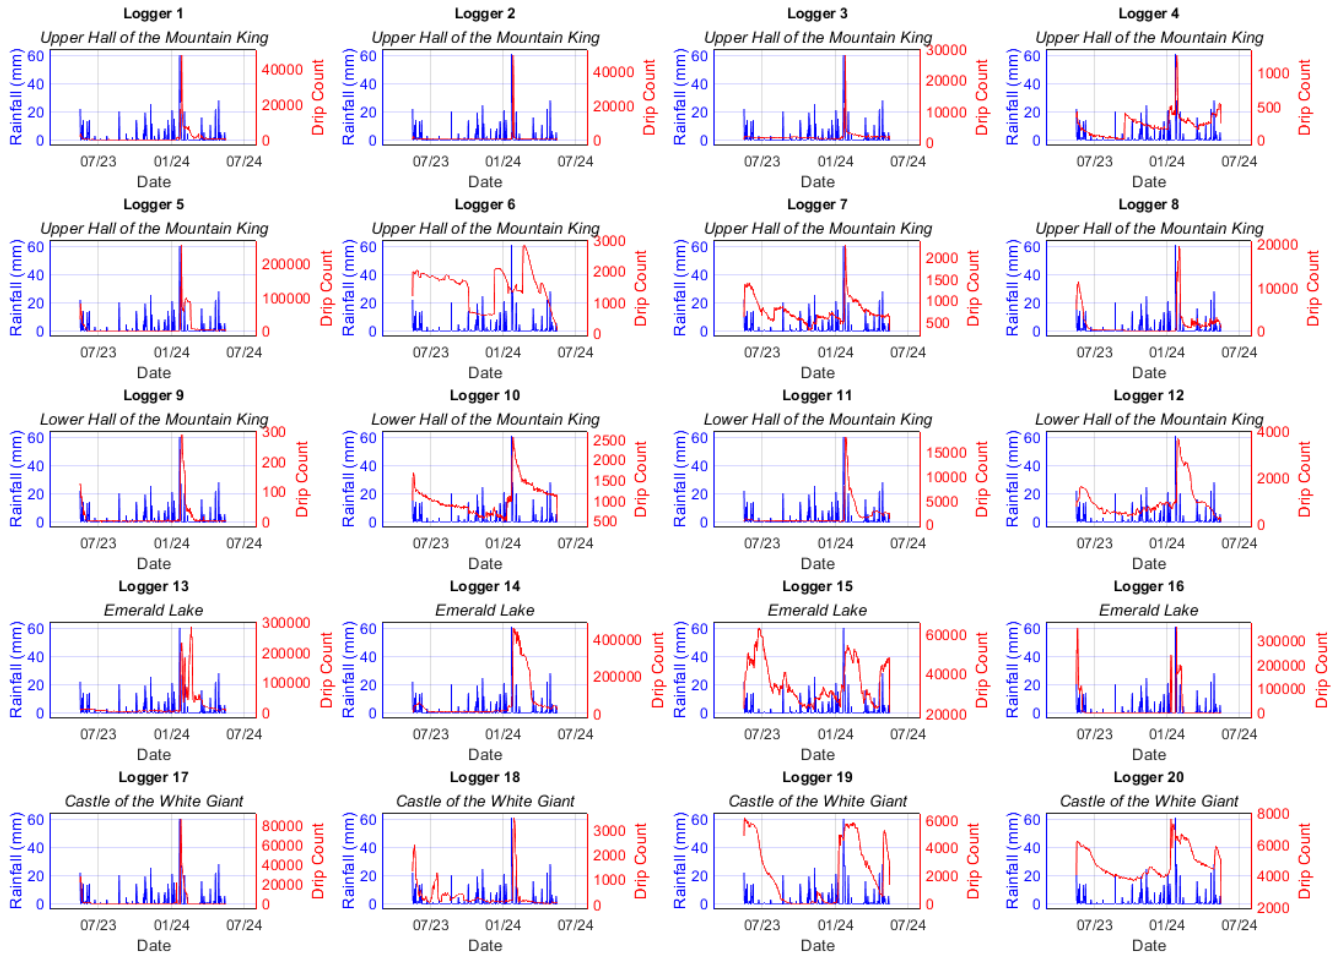

FIGURE S2 - Daily Rainfall (mm) versus Total Daily Logger Drip Count. Several sites display some response to antecedent precipitation events with a rapid increase from baseline drip rate (Loggers 1,2,3,4,5,9). Some display an almost instantaneous response while others exhibit a delayed response in particular to the January 2024 rainfall event (Loggers 6,8)

# **Daily Soil Water Content [SWC] (%) vs Total Daily Logger Drip Count** **May 2023 to May 2024**

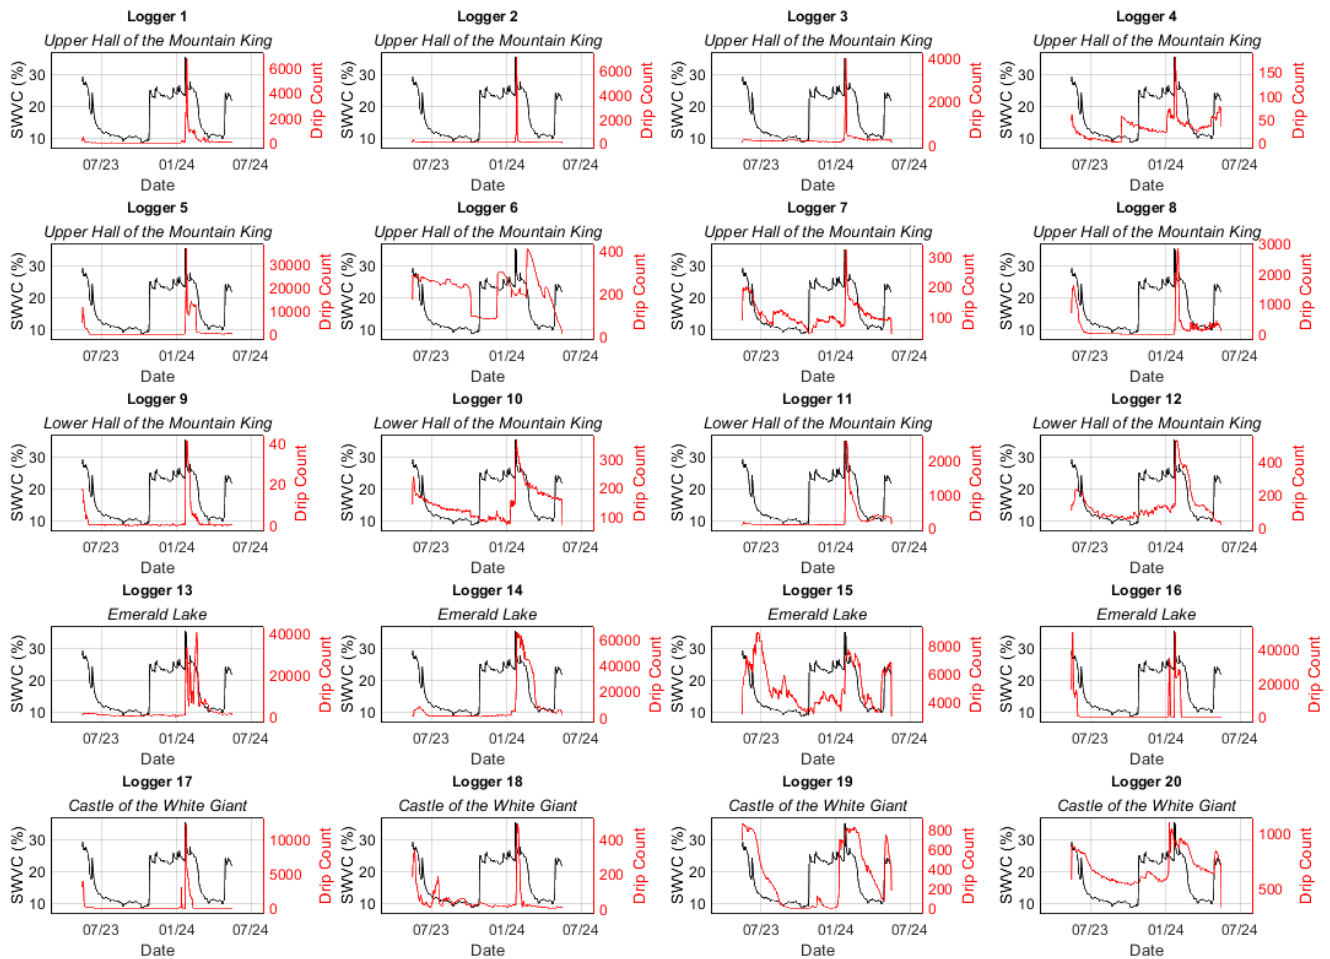

16

17 **FIGURE S3 - Daily Soil Water Content (SWC) vs Total Daily Logger Drip Count.**

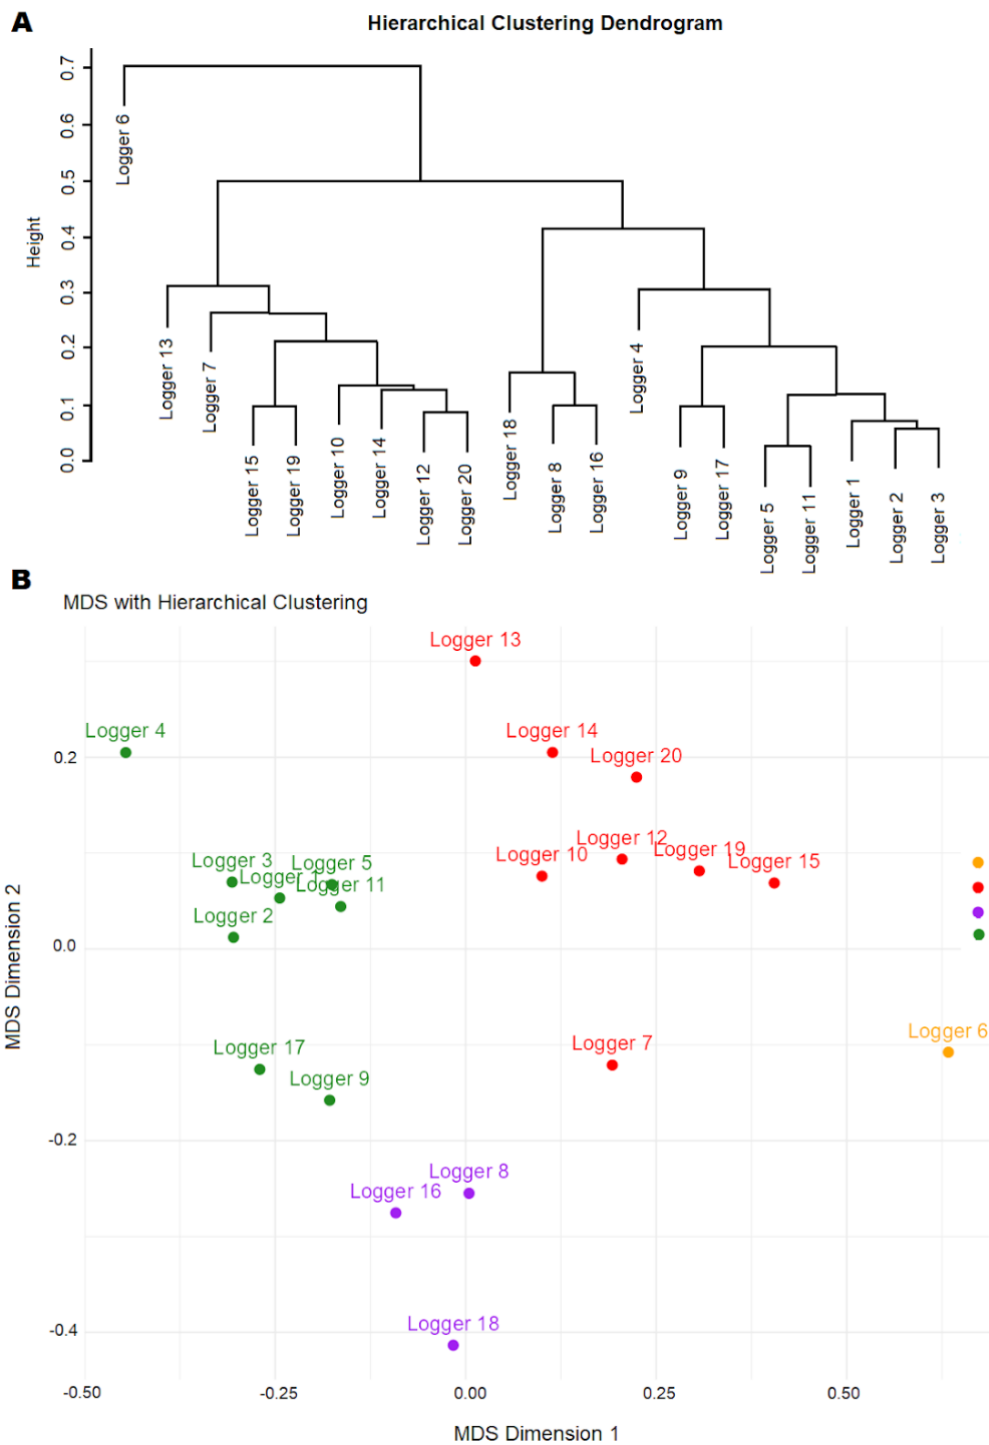

FIGURE S4 – (A) Hierarchical clustering dendrogram showing cluster tree. (B) Results of the hierarchical clustering grouping for loggers at NBC drip sites.

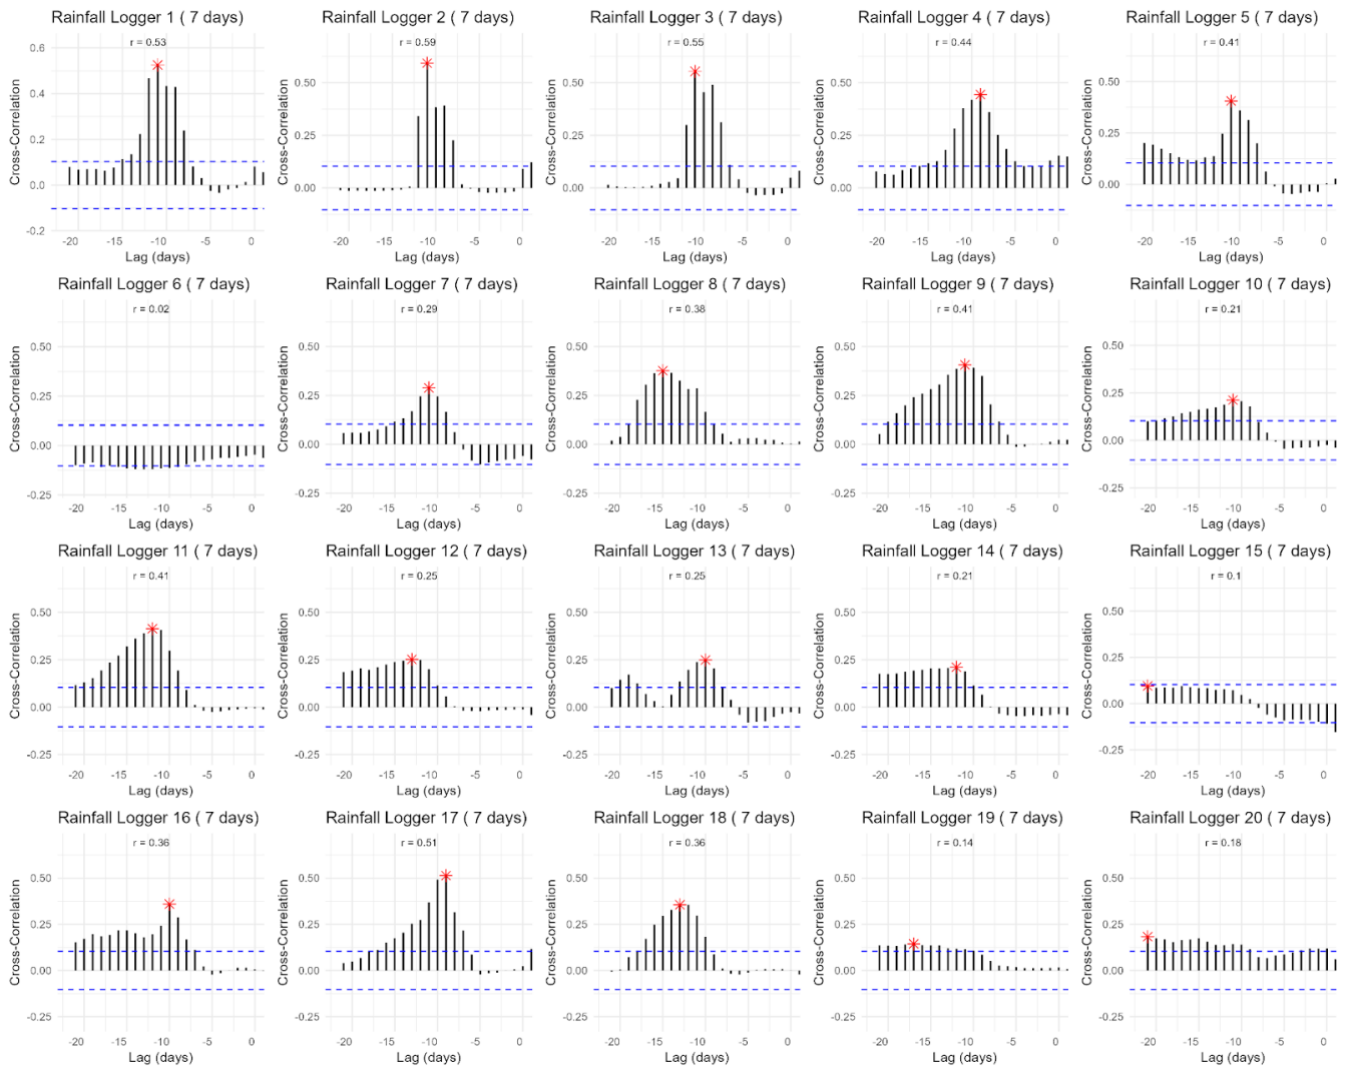

FIGURE S5 - Cross correlation plot of 7-day antecedent rainfall maintained a highly correlated relationship up to 14 days.

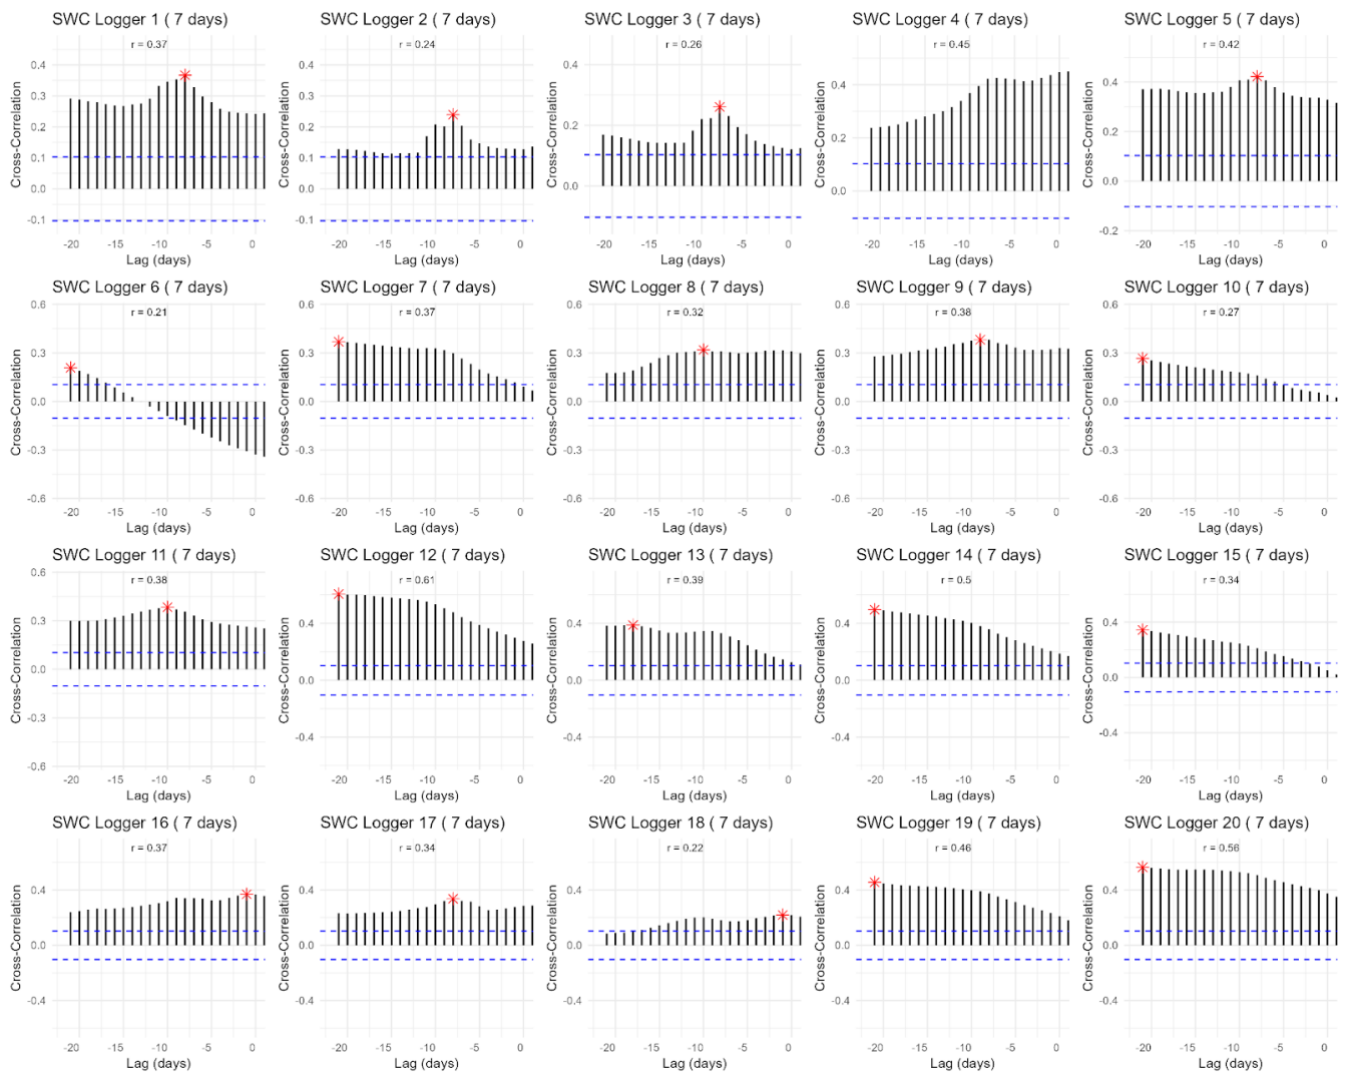

FIGURE S6 - Cross correlation plot of 7-day antecedent soil water content (SWC) maintained a highly correlated relationship up to 14 days.
